# Supplementary material for: Optimizing a dynamic fossil fuel CO 2 emission model with CTDAS (CarbonTracker Data Assimilation Shell, v1.0) for an urban area using atmospheric observations of CO 2 , CO, NO x , and SO 2
Source: Copernicus journal article supplement (doi:10.5194/gmd-13-2695-2020), 2020-06-18
Supplement: Supplementary file 1 [file gmd-13-2695-2020-supplement.zip]

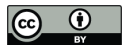

## *Supplement of*

# **Optimizing a dynamic fossil fuel CO<sub>2</sub> emission model with CTDAS (CarbonTracker Data Assimilation Shell, v1.0) for an urban area using atmospheric observations of CO<sub>2</sub>, CO, NO<sub>x</sub>, and SO<sub>2</sub>**

**Ingrid Super et al.**

*Correspondence to:* Ingrid Super (ingrid.super@tno.nl)

- gmd-13-2695-2020-supplement-title-page.pdf
- Supplement
  - CTDAS
    - \* exec
  - Data
    - \* background.nc
    - \* covariances.nc
    - \* emis\_parameters\_prior.csv
    - \* emis\_parameters\_true.csv
    - \* obsfile\_Fl\_1.nc
    - \* obsfile\_Fl\_2.nc
    - \* obsfile\_Fl\_3.nc
    - \* obsfile\_Fl\_4.nc
    - \* obsfile\_HH\_1.nc
    - \* obsfile\_HH\_2.nc
    - \* obsfile\_HH\_3.nc
    - \* obsfile\_HH\_4.nc
    - \* obsfile\_Hv\_1.nc
    - \* obsfile\_Hv\_2.nc
    - \* obsfile\_Hv\_3.nc
    - \* obsfile\_Hv\_4.nc
    - \* obsfile\_Kw\_1.nc
    - \* obsfile\_Kw\_2.nc
    - \* obsfile\_Kw\_3.nc
    - \* obsfile\_Kw\_4.nc
    - \* obsfile\_St\_1.nc

- \* obsfile\_St\_2.nc
- \* obsfile\_St\_3.nc
- \* obsfile\_St\_4.nc
- \* obsfile\_Zs\_1.nc
- \* obsfile\_Zs\_2.nc
- \* obsfile\_Zs\_3.nc
- \* obsfile\_Zs\_4.nc
- \* obsfile\_Zw\_1.nc
- \* obsfile\_Zw\_2.nc
- \* obsfile\_Zw\_3.nc
- \* obsfile\_Zw\_4.nc
- \* obsfiles\_urban.csv
- \* param\_values.nc
- \* sites\_weights\_Rijnmond.rc
- \* spatial\_data.nc
- \* temporal\_data.nc
- Monte Carlo
  - \* Cov\_matrix.csv
  - \* Cov\_matrix\_time.csv
  - \* Emission\_model.ipynb
- OPS
  - \* ops.rc
  - \* runCO2\_prior.brn
  - \* runCO\_prior.brn
  - \* runNOx\_prior.brn
  - \* runSO2\_prior.brn
  - \* run\_urban.rpt

The copyright of individual parts of the supplement might differ from the CC BY 4.0 License.
